# Supplementary material for: Epigenetic silencing of miR-338 facilitates glioblastoma progression by de-repressing the pyruvate kinase M2-β-catenin axis
Source: publisher site journal article supplement (doi:10.18632/aging.101271), 2017-08-02

**SUPPLEMENTARY MATERIAL**

**Supplementary Table S1. The sequence of real-time PCR primers.**

| Gene    | Forward Sequence     | Reverse Sequence     |
|---------|----------------------|----------------------|
| β-actin | CTGGGACGACATGGAGAAAA | AAGGAAGGCTGGAAGAGTGC |
| PKM2    | GAACATCCTGTGGCTGGACT | GCACCTTTCTGCTTCACCTG |

**Supplementary Table S2. The sequence of miRNA mimics, miRNA Inhibitor, miR-Scr, Inhibitor NC.**

|                          |                                                                                                    |
|--------------------------|----------------------------------------------------------------------------------------------------|
| plain vector             | UUUGUACUACACAAAAGUACUG                                                                             |
| hsa-miR-338              | UCCAGCAUCAGUGAUUUUGUUG                                                                             |
| AS-miR-338               | CAACAAAUCACUGAUGCUGGA                                                                              |
| hsa-miR-338-3p mimic     | positive-sense strand 5'UCCAGCAUCAGUGAUUUUGUUG 3'<br>Antisense strand 3'AGGUCGUAGUCACUAAAACAAC 5'  |
| hsa-miR-338-3p inhibitor | 5'mCmAmAmCmAmAmAmAmUmCmAmCmUmGmAmUmGmCmUmGmGmA<br>3'                                               |
| miR-Scr                  | positive-sense strand 5'-UUUGUACUACACAAAAGUACUG-3'<br>Antisense strand 3'-AAACAUGAUGUGUUUCAUGAC-5' |
| Inhibitor NC             | 5'-<br>mCmAmGmUmAmCmUmUmUmUmGmUmGmUmAmGmUmAmCmAmAmA-3                                              |

Supplementary Table S3. pMIR plasmid profiles.

pMIR plasmid profiles

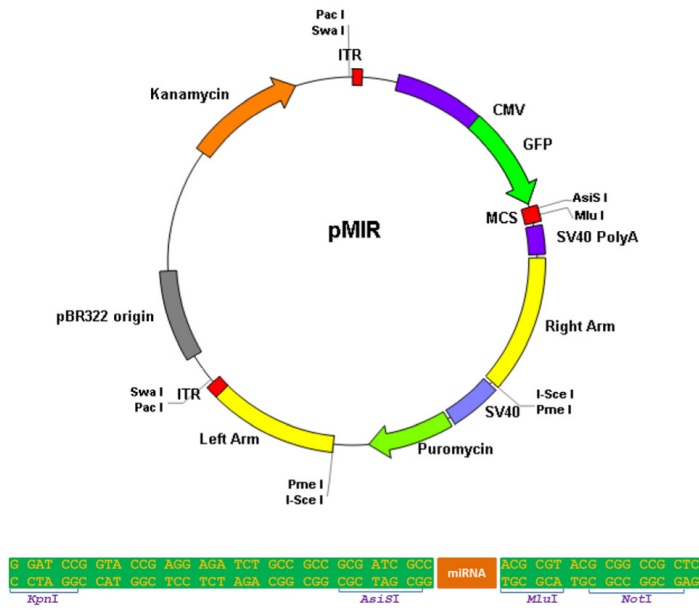

pmirGLO plasmid profiles

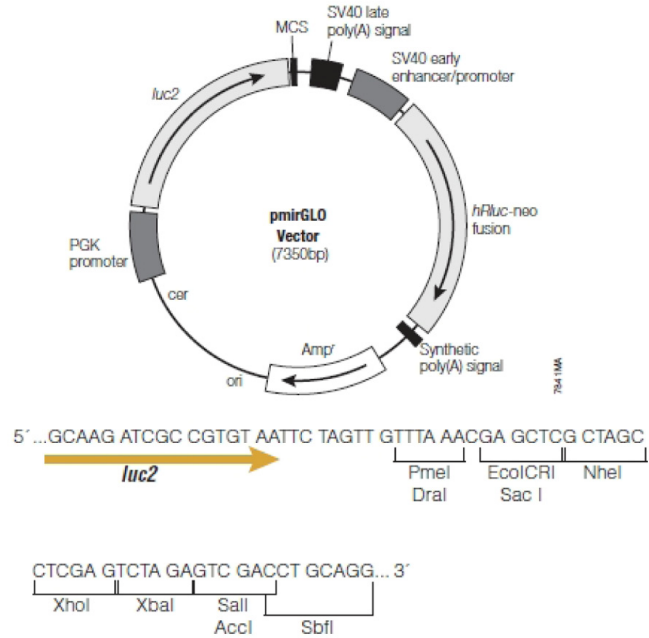

Supplement: Supplementary file [file aging-v9i8-101271-supplementary-material-SD1.pdf]
